# Supplementary material
Source: Springer Nature journal article supplement (https://www.springermedizin.de/resource/supplementary/12937_2013_798_MOESM1_ESM.pdf/25654088)

# PROBIOTICS

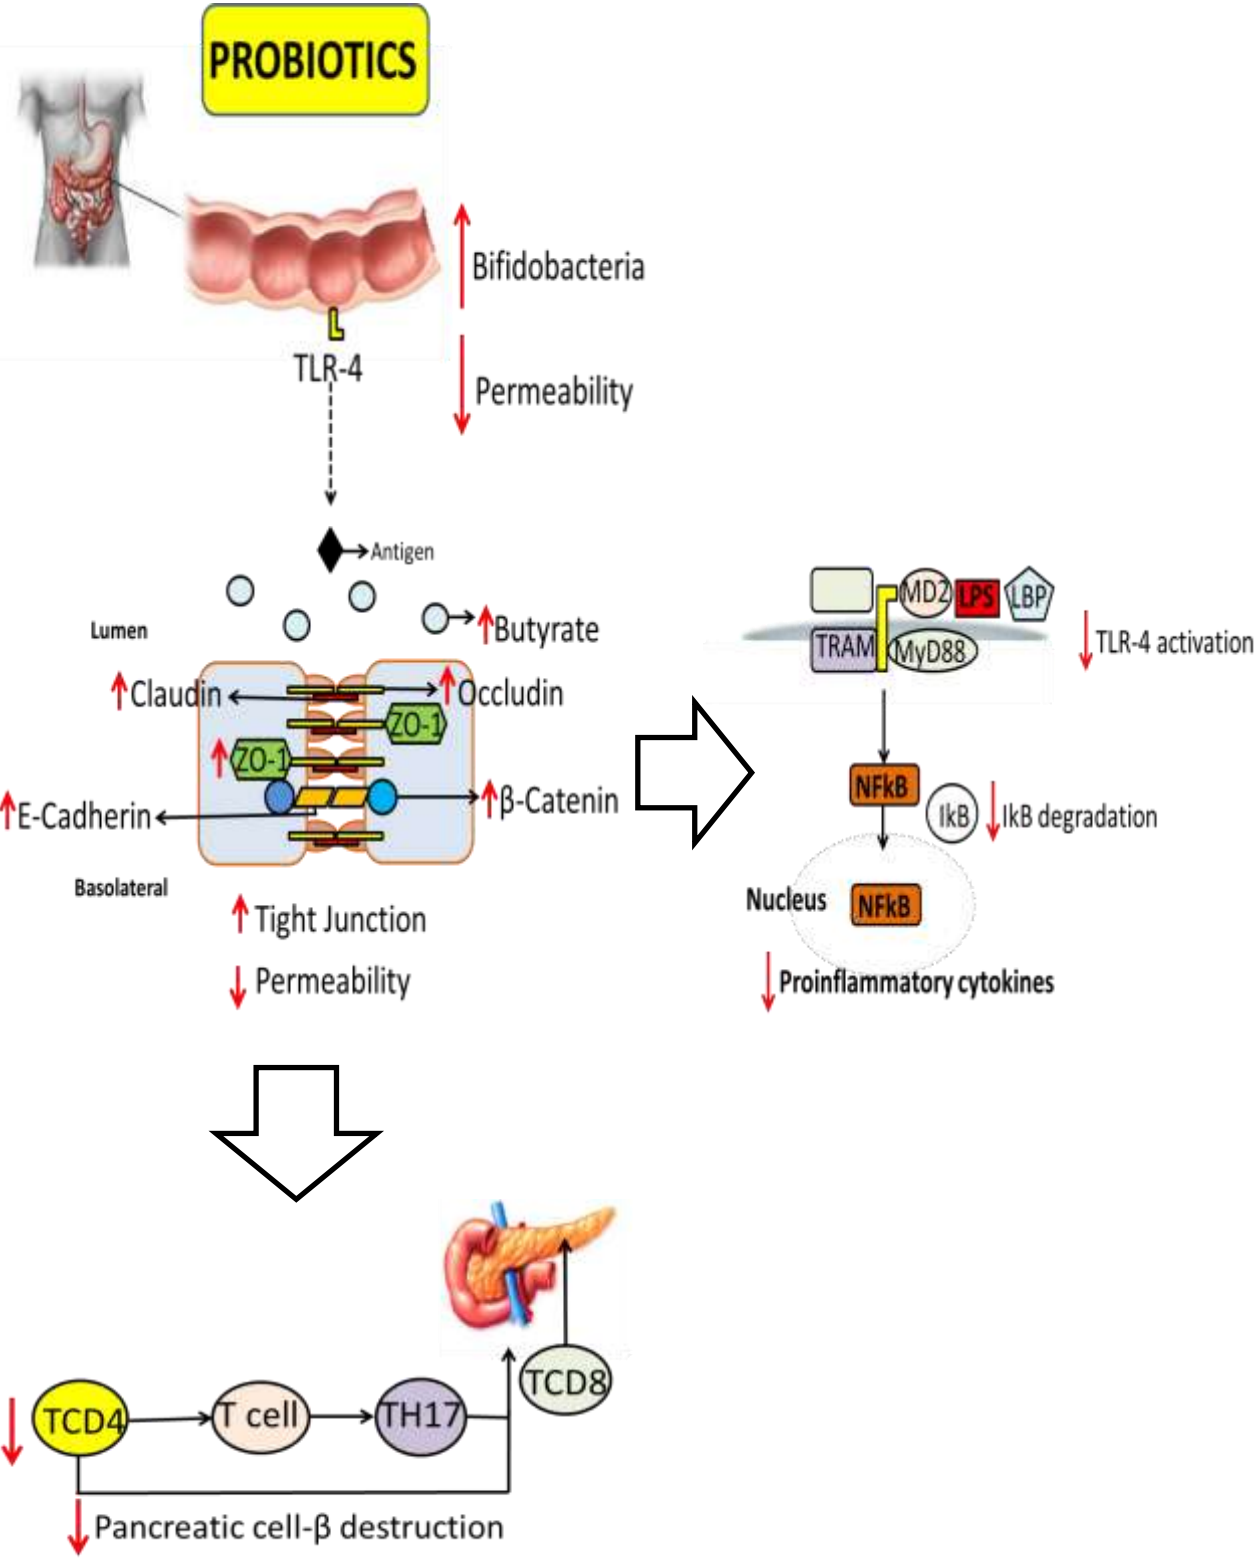

Supplement: MOESM1 [file 25654088]
